# Supplementary material
Source: publisher figshare collection journal article supplement (https://gsajournals.figshare.com/ndownloader/files/15090281)
Supplement: Supplementary file 1 [file 15090281]

## Sheet: Sheet1
File S9. List of predicted secondary metabolite gene clusters in Neurospora crassa
Cluster:1
Backbone_gene_id	Gene_id	Gene_positions	Chromosome-Contig	Gene_order	5'end	3'end	Gene_distance	Domain_score	Annotated_gene_function
NCU00056.2	NCU00056.2	0	2	525	2037946	2039385	0	0	hypothetical protein ( (AF021234) 3-oxoacyl-[acyl-carrier-protein]-synthase [Neurospora crassa] )
NCU00056.2	NCU10763.2	1	2	524	2037013	2034050	933	0	hypothetical protein
NCU00056.2	NCU00055.2	2	2	523	2031393	2030356	2657	0	hypothetical protein
NCU00056.2	NCU00054.2	3	2	522	2027541	2029844	512	1	hypothetical protein
Cluster:2
Backbone_gene_id	Gene_id	Gene_positions	Chromosome-Contig	Gene_order	5'end	3'end	Gene_distance	Domain_score	Annotated_gene_function
NCU02918.2	NCU02918.2	0	3	1941	6913081	6920373	0	1	hypothetical protein
NCU02918.2	NCU02919.2	1	3	1940	6910160	6910821	2260	0	hypothetical protein
NCU02918.2	NCU02920.2	2	3	1939	6909553	6908500	607	1	hypothetical protein
NCU02918.2	NCU02921.2	3	3	1938	6908271	6907600	229	0	hypothetical protein
NCU02918.2	NCU02922.2	4	3	1937	6905130	6906307	1293	1	hypothetical protein
NCU02918.2	NCU02923.2	5	3	1936	6903888	6902980	1242	1	hypothetical protein
NCU02918.2	NCU02924.2	6	3	1935	6902439	6901335	541	0	hypothetical protein
NCU02918.2	NCU02925.2	7	3	1934	6899487	6898068	1848	1	hypothetical protein
NCU02918.2	NCU02926.2	8	3	1933	6894368	6895933	2135	1	hypothetical protein
NCU02918.2	NCU02927.2	9	3	1932	6892039	6890231	2329	1	hypothetical protein
NCU02918.2	NCU02928.2	10	3	1931	6884554	6888747	1484	0	hypothetical protein
NCU02918.2	NCU02929.2	11	3	1930	6883212	6880847	1342	0	hypothetical protein
NCU02918.2	NCU02930.2	12	3	1929	6877239	6878290	2557	0	hypothetical protein
NCU02918.2	NCU02931.2	13	3	1928	6875621	6873359	1618	0	hypothetical protein
NCU02918.2	NCU02932.2	14	3	1927	6871467	6872151	1208	0	hypothetical protein
NCU02918.2	NCU02933.2	15	3	1926	6870549	6870106	918	0	predicted protein
NCU02918.2	NCU02934.2	16	3	1925	6865847	6868764	1342	1	hypothetical protein
Cluster:3
Backbone_gene_id	Gene_id	Gene_positions	Chromosome-Contig	Gene_order	5'end	3'end	Gene_distance	Domain_score	Annotated_gene_function
NCU04531.2	NCU04531.2	0	5	33	102657	111410	0	0	hypothetical protein
NCU04531.2	NCU10525.2	1	5	32	101384	99956	1273	0	predicted protein
NCU04531.2	NCU04532.2	2	5	31	99331	97643	625	0	hypothetical protein
NCU04531.2	NCU04533.2	3	5	30	96816	97439	204	0	hypothetical protein
NCU04531.2	NCU04534.2	4	5	29	92305	93824	2992	0	hypothetical protein
NCU04531.2	NCU10145.2	5	5	28	90343	91084	1221	0	predicted protein
NCU04531.2	NCU04535.2	6	5	27	89848	86877	495	0	hypothetical protein
NCU04531.2	NCU04536.2	7	5	26	83372	84490	2387	0	predicted protein
NCU04531.2	NCU04537.2	8	5	25	80620	78915	2752	1	hypothetical protein
Cluster:4
Backbone_gene_id	Gene_id	Gene_positions	Chromosome-Contig	Gene_order	5'end	3'end	Gene_distance	Domain_score	Annotated_gene_function
NCU04865.2	NCU04866.2	-1	8	116	666025	662817	2954	1	hypothetical protein
NCU04865.2	NCU04865.2	0	8	115	652008	659863	0	1	hypothetical protein
Cluster:5
Backbone_gene_id	Gene_id	Gene_positions	Chromosome-Contig	Gene_order	5'end	3'end	Gene_distance	Domain_score	Annotated_gene_function
NCU06013.2	NCU06011.2	-2	7	472	1837369	1842546	1782	1	hypothetical protein
NCU06013.2	NCU06012.2	-1	7	471	1834627	1835587	2074	0	hypothetical protein
NCU06013.2	NCU06013.2	0	7	470	1832553	1824927	0	1	hypothetical protein
Cluster:6
Backbone_gene_id	Gene_id	Gene_positions	Chromosome-Contig	Gene_order	5'end	3'end	Gene_distance	Domain_score	Annotated_gene_function
NCU07119.2	NCU07119.2	0	7	965	3569214	3553636	0	0	hypothetical protein
NCU07119.2	NCU07120.2	1	7	964	3552669	3553504	132	0	hypothetical protein
NCU07119.2	NCU07121.2	2	7	963	3550691	3548426	1978	0	hypothetical protein
NCU07119.2	NCU07122.2	3	7	962	3546143	3547415	1011	0	hypothetical protein
NCU07119.2	NCU07123.2	4	7	961	3545540	3543382	603	0	hypothetical protein
NCU07119.2	NCU07124.2	5	7	960	3541329	3539705	2053	0	hypothetical protein
NCU07119.2	NCU07125.2	6	7	959	3536348	3539503	202	0	hypothetical protein
NCU07119.2	NCU07126.2	7	7	958	3535272	3534529	1076	1	hypothetical protein
NCU07119.2	NCU07127.2	8	7	957	3533354	3534279	250	0	hypothetical protein
NCU07119.2	NCU07128.2	9	7	956	3530979	3530255	2375	0	hypothetical protein
NCU07119.2	NCU07129.2	10	7	955	3528124	3526245	2131	1	hypothetical protein
Cluster:7
Backbone_gene_id	Gene_id	Gene_positions	Chromosome-Contig	Gene_order	5'end	3'end	Gene_distance	Domain_score	Annotated_gene_function
NCU08399.2	NCU10383.2	-14	6	1012	3144557	3143544	557	1	hypothetical protein similar to glutamic oxaloacetic transaminase (EC 2.6.1.1)
NCU08399.2	NCU10866.2	-13	6	1011	3142163	3142987	1963	0	hypothetical protein
NCU08399.2	NCU10164.2	-12	6	1010	3140200	3140159	335	0	predicted protein
NCU08399.2	NCU10283.2	-11	6	1009	3137550	3139824	797	0	tryptophan synthetase
NCU08399.2	NCU10272.2	-10	6	1008	3136753	3135293	1574	0	hypothetical protein
NCU08399.2	NCU10368.2	-9	6	1007	3133719	3130508	1640	1	hypothetical protein
NCU08399.2	NCU10650.2	-8	6	1006	3128868	3127867	1757	1	hypothetical protein
NCU08399.2	NCU10133.2	-7	6	1005	3126110	3124569	1123	0	hypothetical protein
NCU08399.2	NCU10423.2	-6	6	1004	3118065	3123446	3344	1	hypothetical protein
NCU08399.2	NCU10833.2	-5	6	1003	3114721	3113537	1287	0	hypothetical protein
NCU08399.2	NCU10574.2	-4	6	1002	3112250	3111072	12830	1	hypothetical protein
NCU08399.2	NCU10296.2	-3	6	1001	3098067	3098242	5749	0	predicted protein
NCU08399.2	NCU08401.2	-2	6	1000	3092318	3091963	5856	0	hypothetical protein
NCU08399.2	NCU08400.2	-1	6	999	3085863	3086107	3655	0	hypothetical protein
NCU08399.2	NCU08399.2	0	6	998	3082208	3074332	0	1	hypothetical protein
Cluster:8
Backbone_gene_id	Gene_id	Gene_positions	Chromosome-Contig	Gene_order	5'end	3'end	Gene_distance	Domain_score	Annotated_gene_function
NCU08404.2	NCU08411.2	-8	6	1059	3322995	3321982	557	1	hypothetical protein similar to glutamic oxaloacetic transaminase (EC 2.6.1.1)
NCU08404.2	NCU08410.2	-7	6	1058	3320601	3321425	1963	0	hypothetical protein
NCU08404.2	NCU10330.2	-6	6	1057	3318638	3318597	335	0	predicted protein
NCU08404.2	NCU08409.2	-5	6	1056	3315988	3318262	797	0	tryptophan synthetase
NCU08404.2	NCU08408.2	-4	6	1055	3315191	3313731	1574	0	hypothetical protein
NCU08404.2	NCU08407.2	-3	6	1054	3312157	3308946	1640	1	hypothetical protein
NCU08404.2	NCU08406.2	-2	6	1053	3307306	3306305	1757	1	hypothetical protein
NCU08404.2	NCU08405.2	-1	6	1052	3304548	3303007	1123	0	hypothetical protein
NCU08404.2	NCU08404.2	0	6	1051	3296503	3301884	0	1	hypothetical protein
NCU08404.2	NCU08403.2	1	6	1050	3293159	3291975	3344	0	hypothetical protein
NCU08404.2	NCU08402.2	2	6	1049	3290688	3289510	1287	1	hypothetical protein
Cluster:9
Backbone_gene_id	Gene_id	Gene_positions	Chromosome-Contig	Gene_order	5'end	3'end	Gene_distance	Domain_score	Annotated_gene_function
NCU08441.2	NCU08443.2	-2	6	1046	3262870	3259699	973	1	conserved hypothetical protein
NCU08441.2	NCU08442.2	-1	6	1045	3257971	3258726	908	0	hypothetical protein
NCU08441.2	NCU08441.2	0	6	1044	3250906	3257063	0	0	hypothetical protein
NCU08441.2	NCU08440.2	1	6	1043	3248817	3247956	2089	1	hypothetical protein
NCU08441.2	NCU08439.2	2	6	1042	3245772	3241469	2184	1	hypothetical protein
NCU08441.2	NCU08438.2	3	6	1041	3240075	3239645	1394	0	hypothetical protein
NCU08441.2	NCU08437.2	4	6	1040	3239111	3238444	534	0	hypothetical protein
NCU08441.2	NCU08436.2	5	6	1039	3236473	3238131	313	0	hypothetical protein
NCU08441.2	NCU08435.2	6	6	1038	3230854	3235032	1441	0	hypothetical protein
NCU08441.2	NCU08434.2	7	6	1037	3228736	3227459	2118	1	hypothetical protein
NCU08441.2	NCU08433.2	8	6	1036	3224711	3223709	2748	0	hypothetical protein
NCU08441.2	NCU08432.2	9	6	1035	3222613	3221841	1096	0	hypothetical protein
NCU08441.2	NCU08431.2	10	6	1034	3219776	3218475	2065	0	hypothetical protein
NCU08441.2	NCU08430.2	11	6	1033	3216328	3215963	2147	0	predicted protein
NCU08441.2	NCU08429.2	12	6	1032	3212922	3211329	3041	0	hypothetical protein
NCU08441.2	NCU08428.2	13	6	1031	3210349	3208615	980	1	conserved hypothetical protein
Cluster:10
Backbone_gene_id	Gene_id	Gene_positions	Chromosome-Contig	Gene_order	5'end	3'end	Gene_distance	Domain_score	Annotated_gene_function
NCU09638.2	NCU09635.2	-3	8	1194	5618343	5619964	861	1	hypothetical protein
NCU09638.2	NCU09636.2	-2	8	1193	5617482	5615661	588	1	hypothetical protein
NCU09638.2	NCU09637.2	-1	8	1192	5613722	5615073	762	1	hypothetical protein
NCU09638.2	NCU09638.2	0	8	1191	5612960	5604872	0	1	hypothetical protein
NCU09638.2	NCU09639.2	1	8	1190	5602281	5604125	747	0	hypothetical protein
NCU09638.2	NCU09640.2	2	8	1189	5599606	5601292	989	1	hypothetical protein
